## RESEARCH ARTICLE

## STEM CELLS AND REGENERATION

# Genome-wide analysis of the bHLH gene family in planarians identifies factors required for adult neurogenesis and neuronal regeneration

Martis W. Cowles<sup>1</sup>, David D. R. Brown<sup>2,3</sup>, Sean V. Nisperos<sup>1</sup>, Brianna N. Stanley<sup>1</sup>, Bret J. Pearson<sup>2,3,4</sup> and Ricardo M. Zayas<sup>1,\*</sup>

**ABSTRACT**

In contrast to most well-studied model organisms, planarians have a remarkable ability to completely regenerate a functional nervous system from a pluripotent stem cell population. Thus, planarians provide a powerful model to identify genes required for adult neurogenesis *in vivo*. We analyzed the basic helix-loop-helix (bHLH) family of transcription factors, many of which are crucial for nervous system development and have been implicated in human diseases. However, their potential roles in adult neurogenesis or central nervous system (CNS) function are not well understood. We identified 44 planarian bHLH homologs, determined their patterns of expression in the animal and assessed their functions using RNAi. We found nine bHLHs expressed in stem cells and neurons that are required for CNS regeneration. Our analyses revealed that homologs of *coe*, *hes* (*hesl-3*) and *sim* label progenitors in intact planarians, and following amputation we observed an enrichment of *coe*<sup>+</sup> and *sim*<sup>+</sup> progenitors near the wound site. RNAi knockdown of *coe*, *hesl-3* or *sim* led to defects in CNS regeneration, including failure of the cephalic ganglia to properly pattern and a loss of expression of distinct neuronal subtype markers. Together, these data indicate that *coe*, *hesl-3* and *sim* label neural progenitor cells, which serve to generate new neurons in uninjured or regenerating animals. Our study demonstrates that this model will be useful to investigate how stem cells interpret and respond to genetic and environmental cues in the CNS and to examine the role of bHLH transcription factors in adult tissue regeneration.

**KEY WORDS:** Basic helix-loop-helix, *Coe*, *Single-minded*, *Hes*, Neurogenesis, Lophotrochozoan, Planarians, Regeneration, *Schmidtea mediterranea*, Stem cells, Neoblasts

**INTRODUCTION**

The discovery that neurogenesis persists in the central nervous system (CNS) of adult animals (Gage, 2002) changed a long-held doctrine that neurons were only produced in the embryo (Ramón y Cajal, 1928; Kempermann, 2011). Although it is now well accepted that adult neurogenesis is a widespread phenomenon across diverse metazoans (Lindsey and Tropepe, 2006; Kempermann, 2012), the ability of most organisms to produce new neurons does not

compensate for cells lost after injury or disease. Therefore, to examine how neural precursors could be directed to repair CNS neurons *in vivo*, comparative approaches using animal models of regeneration will help us to gain insights into the basic mechanisms needed to reestablish nervous system function after injury or the onset of neurodegenerative disease (Kempermann, 2011).

Freshwater planarians have emerged as an excellent model to examine the molecular mechanisms underlying stem cell biology and tissue replacement (Elliott and Sánchez Alvarado, 2013; King and Newmark, 2012). Following amputation, planarians are capable of restoring lost body parts from a population of adult pluripotent stem cells called neoblasts (Baguña, 2012; Elliott and Sánchez Alvarado, 2013). Planarian stem cells share conserved pluripotency determinants with mammalian stem cells (Labbé et al., 2012; Önal et al., 2012; Solana et al., 2012) and serve to replace cells lost during normal physiological cell turnover or after amputation. In contrast to most model organisms currently studied, planarians have the remarkable ability to regenerate their CNS after injury. Thus, these animals provide an excellent opportunity to analyze mechanisms underlying stem cell regulation and CNS regeneration *in vivo*. The planarian CNS consists of bi-lobed cephalic ganglia (brain) that are connected to two longitudinal ventral nerve cords projecting posteriorly along the length of the animal. Distinct neuronal cell types have been described by histochemistry, including unipolar and bipolar neurons as well as neurosecretory cells (Bullock and Horridge, 1965; Lentz, 1968). The generation of genomic resources has led to identification of hundreds of neural markers that have been used to show that the planarian CNS is molecularly complex (Gentile et al., 2011), but little is known about how these animals regenerate their nervous system. On the basis of elegant single cell transplantation studies in lethally irradiated planarians (Wagner et al., 2011), it has been estimated that less than 5% of the planarian stem cells are truly pluripotent (Rink, 2013). Therefore, we and others hypothesize that a fraction of the heterogeneous stem cell pool may be comprised of lineage-committed or specialized progenitor cells (Reddien, 2013). To fully understand the mechanisms underlying how neuronal diversity is maintained or reestablished in planarians it will be essential to define any neural precursor populations that may exist.

Transcription factors from the basic helix-loop-helix (bHLH) gene family play vital regulatory roles throughout the different stages of neurogenesis in embryos, including neural fate commitment, subtype specification, migration and axon guidance (Bertrand et al., 2002; Guillemot, 2007). Genes of the *Drosophila achaete-scute* complex represent the prototypical proneural genes that are important for development of the peripheral and central nervous systems (Jan and Jan, 1994). Proneural genes have been identified

<sup>1</sup>Department of Biology, San Diego State University, San Diego, CA 92182, USA.

<sup>2</sup>The Hospital for Sick Children, Program in Developmental and Stem Cell Biology, Toronto, ON M5G 0A4, Canada. <sup>3</sup>University of Toronto, Department of Molecular Genetics, Toronto, ON M5S 1A8, Canada. <sup>4</sup>Ontario Institute for Cancer Research, Toronto, ON M5G 1L7, Canada.

\*Author for correspondence (rzayas@mail.sdsu.edu)

in sponges (Richards et al., 2008) and their roles are conserved from cnidarians to vertebrates (Lindsey and Tropepe, 2006; Galliot et al., 2009). However, the precise function of bHLH genes in embryos or adult neural stem cells remains poorly understood (Kintner, 2002). Here we have performed a genome-wide analysis of bHLH family genes to identify factors essential for CNS tissue renewal in adult planarians. Our screen identified nine genes that are expressed in both the stem cells and neurons and are required for normal CNS regeneration, including homologs of *collier/olfactory-1/early B-cell factor (coe)*, *hairy/enhancer of split (hes-like-3)* and *single-minded (sim)*. To characterize and follow the fate of *coe*<sup>+</sup>, *hesl-3*<sup>+</sup> and *sim*<sup>+</sup> stem cells, we performed bromodeoxyuridine (BrdU) pulse-chase experiments and found that *coe* and *sim* are expressed in proliferating cells adjacent to the CNS, which can be traced to the brain or ventral nerve cords over the course of 2 days. During regeneration, we observed an enrichment of *coe*<sup>+</sup> and *sim*<sup>+</sup> progenitors near the wound site. Furthermore, RNAi knockdown of *coe*, *hesl-3* or *sim* led to defects in CNS regeneration, including failure of the cephalic ganglia to reconnect or pattern, and a loss of expression of genes unique to distinct neuronal subtypes. Together, these data suggest that *coe*, *hesl-3* and *sim* are expressed in neural progenitor cells and that these bHLH genes are required to generate new neurons in uninjured and regenerating animals. Our study demonstrates that this model will be useful to investigate how stem cells interpret and respond to genetic and environmental cues in the CNS and to examine the role of bHLH transcription factors in adult tissue regeneration.

## RESULTS

### Identification of bHLH family genes in planarians

We identified 44 sequences in the planarian *Schmidtea mediterranea* predicted to encode a bHLH motif and named them according to their homology, as described in the Materials and methods (supplementary material Fig. S1, Table S1; for brevity we have omitted the *Smed* prefix from the gene names). Recent transcriptional profiles generated from sorted cell populations indicate that most bHLH homologs are expressed in the planarian stem cells and their postmitotic progeny (Labbé et al., 2012; Önal et al., 2012; Resch et al., 2012). To investigate cell- and tissue-specific patterns of bHLH gene expression, we performed whole mount *in situ* hybridization (WISH). We confirmed the presence of transcripts in stem cell or their progeny by testing for the loss of gene expression throughout the parenchyma (mesenchyme) 6 days following exposure to  $\gamma$ -irradiation, a treatment that depletes all stem cells and postmitotic progeny (Reddien et al., 2005b; Eisenhoffer et al., 2008). Consistent with the transcriptome data, we found that 35/43 bHLH genes tested are expressed in stem cells and their progeny (supplementary material Table S1). As expected, we also observed bHLH expression in differentiated tissues, including the CNS (21 genes), epidermis (three genes), pharynx (14 genes) or intestine (nine genes) (supplementary material Fig. S2, Table S1). One gene, *neuroD-2*, was not detected by WISH.

### A subset of bHLH genes is expressed in neurons

Of the 12 CNS- and stem-cell-expressed bHLH genes, we selected *atoh*, *coe*, *fer3l-1*, *hesl-3* and *sim* for detailed expression analyses because their transcripts were detected in discrete cell populations (supplementary material Fig. S2). To confirm the pattern of mRNA expression in the CNS and visualize the distribution of these cell populations in reference to the brain, we performed double-fluorescent *in situ* hybridization experiments (dFISH) using the pan-neural marker *pc2* (Collins et al., 2010). *atoh*, *coe*, *fer3l-1*, *hesl-3*

and *sim* were expressed in discrete neural populations throughout the brain and in regenerating tissues (Fig. 1; supplementary material Fig. S3). In addition, *fer3l-1* (supplementary material Fig. S3D), *hesl-3* (Fig. 1D) and *sim* (Fig. 1G) were detected in cells distributed throughout the mesenchyme. We then investigated the expression of *coe*, *hesl-3* and *sim* in specific neuronal subtypes by performing dFISH with markers of cholinergic, GABAergic, octopaminergic, dopaminergic and serotonergic neurons (Umesono et al., 2011). *coe*, *hesl-3* and *sim* were each co-expressed in cholinergic neurons (Fig. 1J-L). We also detected transcripts for *coe* in GABAergic, octopaminergic, dopaminergic and serotonergic neurons and *sim* in octopaminergic and dopaminergic neurons (Fig. 1J,L). These results demonstrate that a subset of bHLH genes is expressed in molecularly distinct differentiated neurons.

### *coe*, *hesl-3* and *sim* label cycling cells in close proximity to the CNS

Following amputation, stem cells proliferate beneath the wound site (post-blastema) and give rise to the regeneration blastema, the structure where postmitotic cells differentiate to form the missing tissues. *atoh*, *coe*, *fer3l-1*, *hesl-3* and *sim* were expressed in the newly regenerated tissues, but it was also noted that these mRNAs were present in cells located in the post-blastema (Fig. 1; supplementary material Fig. S3). Therefore, we examined whether *atoh*, *coe*, *fer3l-1*, *hesl-3* and *sim* could be detected in mitotic cells. We found that, with the exception of *atoh*, their transcripts could be visualized in a subset of anti-phosphohistone-H3<sup>+</sup> cells (Fig. 1C,F,I; supplementary material Fig. S3C,F), which we also observed in uninjured planarians (data not shown).

To distinguish between gene expression in stem cells/progeny or differentiated neurons, we examined the expression of *atoh*, *coe*, *fer3l-1*, *hesl-3* and *sim* following 6 days of  $\gamma$ -irradiation treatment. Compared with control animals, *atoh* expression was reduced throughout the mesenchyme, but we were unable to detect changes in expression in the head or the pre-pharyngeal area even when we used FISH (supplementary material Fig. S3G-J'). In contrast to *atoh*, we observed a reduction of *coe*<sup>+</sup> cells near the brain and between the cephalic ganglia and ventral nerve cords (VNCs) (supplementary material Fig. S3K,K'). *fer3l-1* expression was broadly reduced in the mesenchyme, except for a few cells located on the dorsal surface of the cephalic ganglia and distributed throughout the mesenchyme (supplementary material Fig. S3L,L'). *hesl-3* and *sim* staining were also reduced in the mesenchyme and near the cephalic ganglia following  $\gamma$ -irradiation (supplementary material Fig. S3M-N'). To validate further that *coe*, *hesl-3* and *sim* were expressed in a subset of stem cells, we co-stained these genes with the stem cell marker *smedwi-1* (Reddien et al., 2005b; Eisenhoffer et al., 2008) (Fig. 1M-O). Taken together, our analyses confirmed that bHLH genes were expressed in subsets of stem cells and postmitotic progeny. In addition, we noted that cell populations that expressed *coe*, *hesl-3* and *sim* near the CNS were  $\gamma$ -irradiation-sensitive, further supporting potential roles of these genes in differentiation of neural precursor-like cells.

### *coe* and *sim* are expressed in differentiating neurons

Stemming from our observations that *coe*, *hesl-3* and *sim* were expressed in stem cells and in diverse neural subtypes, we reasoned that these genes label lineage-committed progenitors and differentiating neurons. To address this possibility, we sought to label stem cells expressing *coe*, *hesl-3* or *sim* and map their relative positions in the animal over time. Although the most commonly used tools to trace cell lineages (e.g. genetic marks) (Kretzschmar



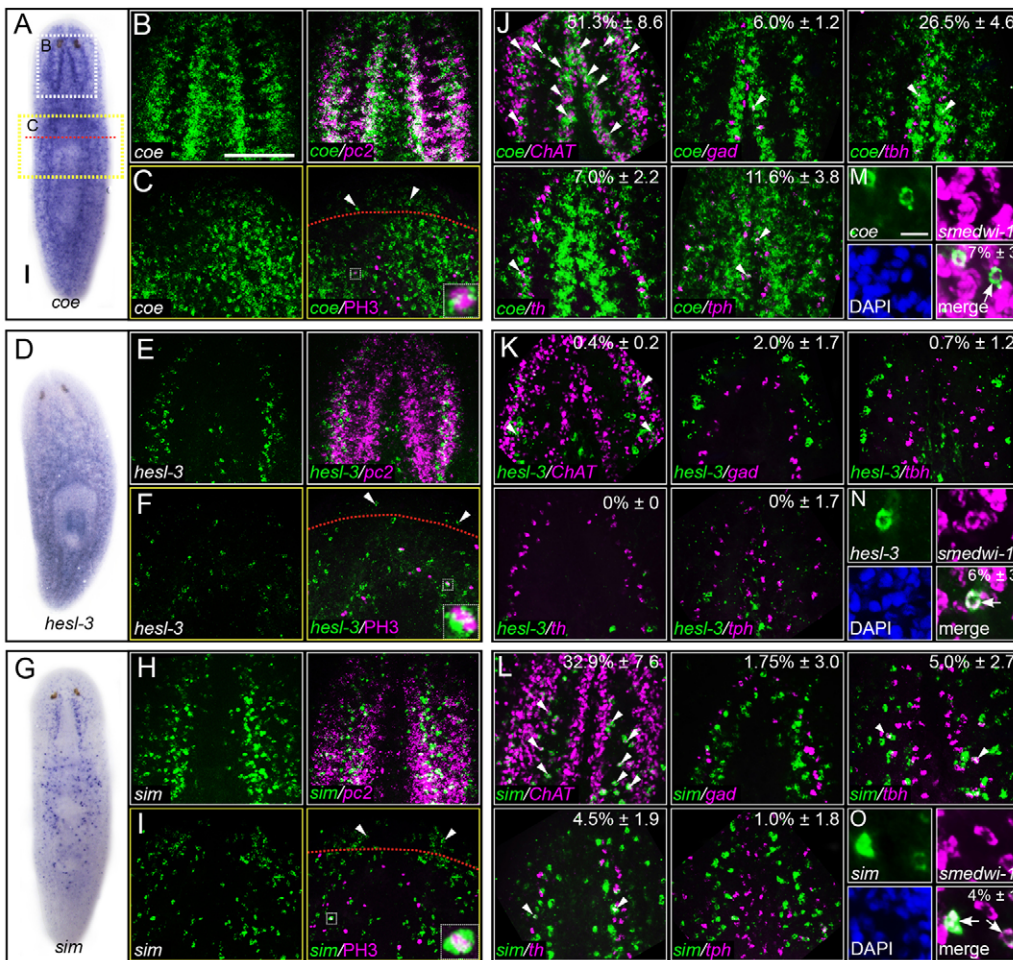

**Fig. 1. *coe*, *hesl-3* and *sim* are expressed in stem cells and neurons.** (A) Expression pattern of *coe*. Dashed boxes indicate zoom area of the brain or regeneration blastema shown in B and C, respectively. Dashed red line indicates site of amputation. (B) FISH to *coe* (green) and *pc2* (magenta). (C) Animals processed for FISH to *coe* and counterstained with anti-phosphohistone-H3 (ph3) to label mitotic cells in 3-day regenerates. Arrowheads denote *coe*<sup>+</sup> cells within the blastema. D-F and G-I show similar analyses for *hesl-3* and *sim*, respectively. White dashed boxes in C, F and I highlight *bHLH*/ph3-positive cells shown at high magnification within merged image insets. (J-L) Animals were processed for dFISH to *coe*, *hesl-3* or *sim* and markers of cholinergic (*ChAT*, *choline acetyltransferase*), GABAergic (*gad*, *glutamic acid decarboxylase*), octopaminergic (*tbh*, *tyramine β-hydroxylase*), dopaminergic (*th*, *tyrosine hydroxylase*) and serotonergic (*tph*, *tryptophan hydroxylase*) neurons. White arrowheads point to co-labeled cells. (M-O) Representative photos of cells imaged at high magnification from animals that were processed for dFISH to *coe*, *hesl-3* or *sim* and counterstained with DAPI. The percentage of the total number of subtype-specific neurons or *smedwi-1*<sup>+</sup> cells that co-expressed *coe*, *hesl-3* or *sim* are shown in J-O. Scale bars: 100 μm in A,B; 10 μm in M.

and Watt, 2012) are not yet available in planarians, it is possible to label S-phase neoblasts with the thymidine analog BrdU and then determine the location of label-retaining cells (Newmark and Sánchez Alvarado, 2000; Eisenhoffer et al., 2008). This approach has been used to study planarian eye (Lapan and Reddien, 2011) and intestinal (Forsthoefel et al., 2011) cell differentiation. Previous studies have estimated that the length of S/G2/M in planarians is between 12 and 16 hours (Newmark and Sánchez Alvarado, 2000). We predicted that at later time points BrdU<sup>+</sup> cells in the head marked by any of these bHLH genes would represent differentiating stem cells. Accordingly, we noted that, as expected, *coe*<sup>+</sup> and *sim*<sup>+</sup> cells were *smedwi-1*<sup>-</sup> in the anterior region of the brain (supplementary material Fig. S4). We pulsed animals with BrdU and inspected animals for BrdU<sup>+</sup> and *coe*<sup>+</sup>, *hesl-3*<sup>+</sup> or *sim*<sup>+</sup> cells in the head, pre-pharyngeal and post-pharyngeal areas after a 4-, 24- or 48-hour chase period (Fig. 2). We found that most double-labeled cells were located in the head and pre-pharyngeal regions, and we focused our analyses on these areas.

Following a 4-hour chase, BrdU<sup>+</sup>/*coe*<sup>+</sup> cells were located throughout the mesenchyme of the head, pre- and post-pharyngeal regions, with some cells in close proximity to the brain and VNCs (Fig. 2A,A'). Over time, BrdU<sup>+</sup>/*coe*<sup>+</sup> progeny were detected in more anterior and lateral regions of the cephalic ganglia or directly adjacent to the VNCs (Fig. 2B,C). After 4 hours, BrdU<sup>+</sup>/*sim*<sup>+</sup> cells were only detected in the pre- and post-pharyngeal areas (Fig. 2D,D'). Similar to *coe*<sup>+</sup> progenitors, BrdU<sup>+</sup>/*sim*<sup>+</sup> cell populations could be traced to the CNS over time; by 24 hours, progenitors were

observed near the posterior end of the brain, and by 48 hours, we observed BrdU<sup>+</sup>/*sim*<sup>+</sup> cells at the most anterior tip of the cephalic ganglia (Fig. 2E,F). Cells progressing through S-phase that expressed *hesl-3* were observed throughout the animal (Fig. 2G,G'). In contrast to *coe*<sup>+</sup> and *sim*<sup>+</sup> progenitors, the distribution of BrdU<sup>+</sup>/*hesl-3*<sup>+</sup> cells remained relatively consistent over the course of 48 hours (Fig. 2H,I). To determine whether *coe*, *hesl-3* and *sim* label unique cell populations, we performed dFISH to either *coe* or *hesl-3* with *sim*. We found that *coe*, *hesl-3* and *sim* were not co-expressed in the head; however, although rare, we did observe *coe*<sup>+</sup>/*sim*<sup>+</sup> cells in the pre-pharyngeal area (supplementary material Fig. S5A-E). Consistent with the expression of these genes in *smedwi-1*<sup>+</sup> cells, these data suggest that *coe*, *hesl-3* and *sim* are expressed in lineage-committed progenitors. Moreover, we observed *coe*<sup>+</sup> and *sim*<sup>+</sup> progenitors near the CNS over time, suggesting that these genes are expressed in differentiating neurons.

In addition to determining the location of BrdU<sup>+</sup> cells marked by bHLHs, we quantified the number of double-positive cells over time (Fig. 2J-M). After 4 hours, BrdU<sup>+</sup>/*coe*<sup>+</sup> cells comprised ~3.7% of BrdU<sup>+</sup> cells in the head or pre-pharyngeal area (Fig. 2K). Interestingly, by 48 hours, we observed an increase in the proportion of BrdU<sup>+</sup>/*coe*<sup>+</sup> in both the head (9.5%) and pre-pharyngeal region (10%; Fig. 2K). Similar to *coe*<sup>+</sup> progenitors, the proportion of BrdU<sup>+</sup>/*sim*<sup>+</sup> cells also increased over time (Fig. 2L). By contrast, the proportion of BrdU<sup>+</sup>/*hesl-3*<sup>+</sup> cells remained consistent throughout the head and pre-pharyngeal area over the course of 48 hours (Fig. 2M). Intriguingly, we also noted that after 48 hours we still observed



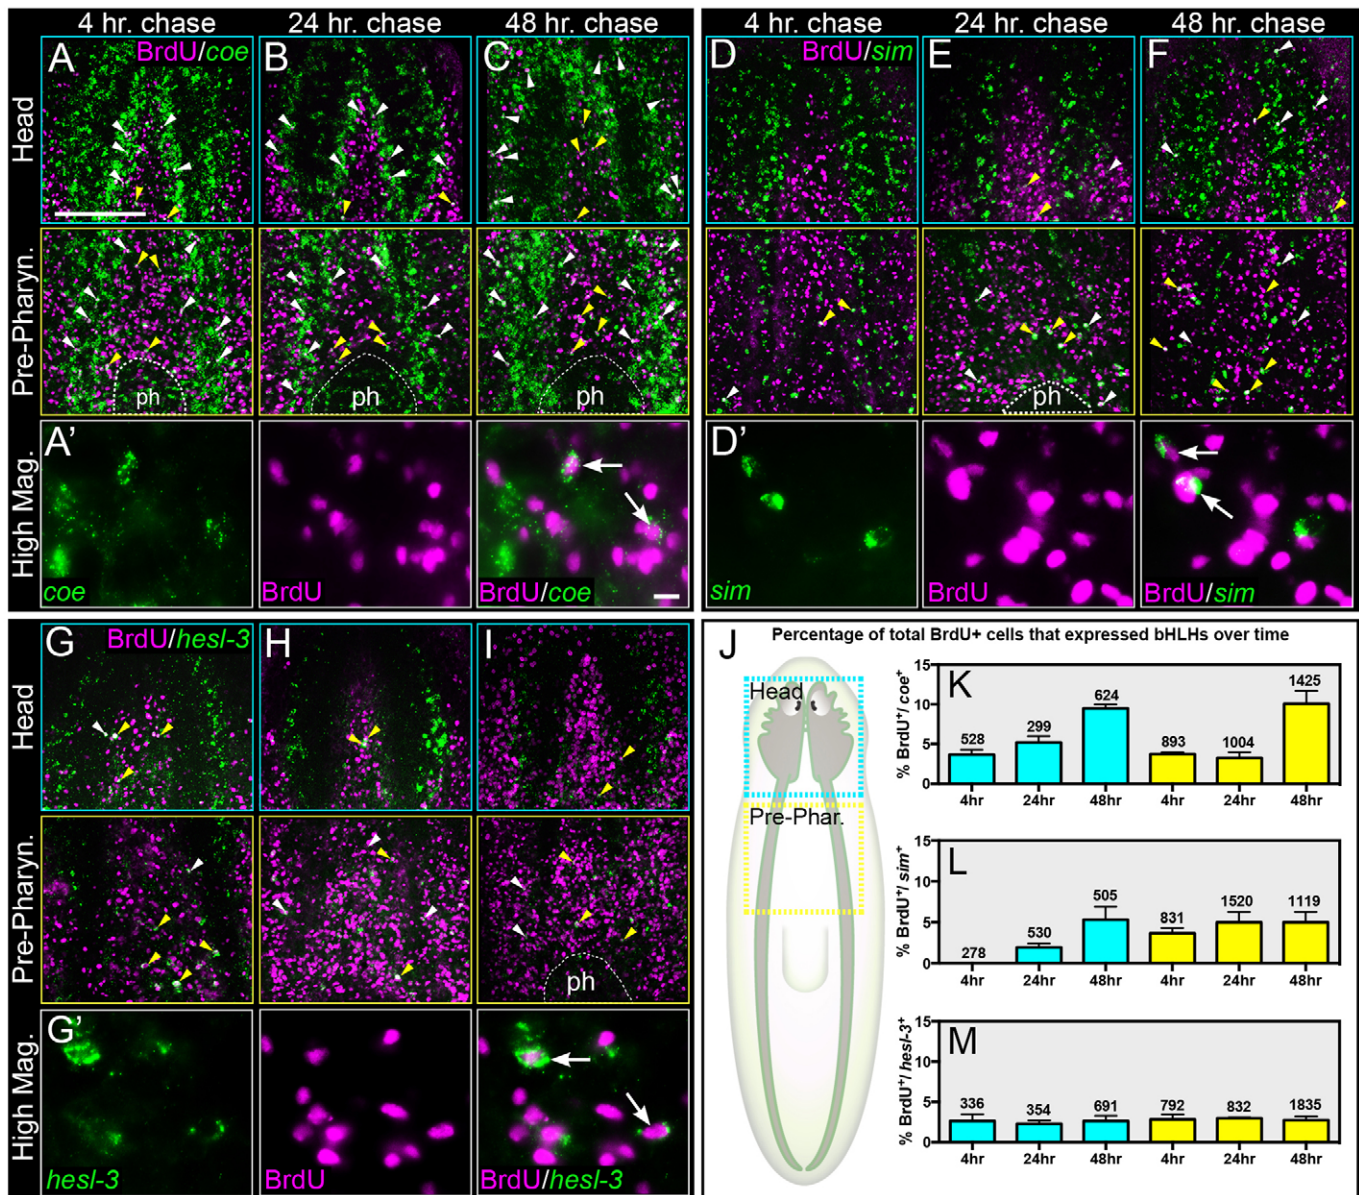

**Fig. 2. Birthdating of *coe*<sup>+</sup>, *hesl-3*<sup>+</sup> and *sim*<sup>+</sup> progenitors.** (A-C) Intact animals were pulsed with BrdU, followed by a 4-, 24- or 48-hour chase and stained for BrdU and *coe*. Arrowheads point to BrdU<sup>+</sup>/*coe*<sup>+</sup> cells near the CNS (white) or the mesenchyme (yellow). (A') High magnification of animals in A; the arrows indicate BrdU<sup>+</sup>/*coe*<sup>+</sup> cells. Similar analyses for *sim* and *hesl-3* are shown in D-F and G-I, respectively. (J) Cartoon depicting the regions counted in K-M. (K-M) Percentage of the total number of BrdU<sup>+</sup> cells that are *coe*<sup>+</sup>, *hesl-3*<sup>+</sup> or *sim*<sup>+</sup> following a 4, 24- or 48-hour pulse; numbers correspond to the total number of BrdU<sup>+</sup> cells counted. Blue and yellow bars indicate cell counts from the head and pre-pharyngeal regions, respectively. Scale bars: 100 μm in A; 10 μm in A'. ph, pharynx.

BrdU<sup>+</sup> cells expressing *coe*, *hesl-3* or *sim* in the pre-pharyngeal area (yellow arrowheads in Fig. 2C,F,I), the same location where most *coe*<sup>+</sup>, *hesl-3*<sup>+</sup> and *sim*<sup>+</sup> cycling cells were first detected following a 4-hour chase period (Fig. 2A,D,G), which suggests that new progenitors were generated or differentiating cells turned on expression of these genes. The increase in the proportion of BrdU<sup>+</sup> cells that expressed *coe* or *sim* near the brain and VNCs, combined with the observation that these genes were expressed in diverse neuronal subtypes (Fig. 1J,L), demonstrate that at least some *coe*<sup>+</sup> and *sim*<sup>+</sup> progenitors differentiate into neurons. The fact that we did not observe changes in the proportion of *hesl-3* suggests a potential role of this gene in progenitor cell maintenance (Ishibashi et al., 1995; Kageyama et al., 2008).

In addition, we investigated whether these *coe*<sup>+</sup> and *sim*<sup>+</sup> progenitor populations contribute to the generation of the regeneration blastema following amputation. By 2 and 3 days of regeneration, BrdU<sup>+</sup>/*coe*<sup>+</sup> and BrdU<sup>+</sup>/*sim*<sup>+</sup> cells were detected in the post-blastema of animals regenerating new heads, with most BrdU<sup>+</sup>/*coe*<sup>+</sup> progenitors located directly adjacent to the VNCs and many BrdU<sup>+</sup>/*sim*<sup>+</sup> progenitors located between the VNCs (Fig. 3A-D). In *S. mediterranea*, head regeneration is completed within 7 days following amputation, and we found that the distribution of BrdU<sup>+</sup>/*coe*<sup>+</sup> or BrdU<sup>+</sup>/*sim*<sup>+</sup> cells observed in uninjured animals was reestablished by this time point (Fig. 2A,D, Fig. 3G-J). Taken together, these data are consistent with the hypothesis that the blastema is generated from a heterogeneous population of lineage-committed cells (Reddien, 2013).



### FGF signaling modulates expression of *sim*<sup>+</sup> and *coe*<sup>+</sup> neurons and progenitors

Gene silencing of *nou-darake* (*ndk*), an FGF receptor-like gene, disrupts anterior patterning and leads to ectopic expression of brain-specific neurons outside of the head domain (Cebrià et al., 2002). We hypothesized that *ndk* silencing would cause an increase in the number of *coe*<sup>+</sup> and *sim*<sup>+</sup> progenitor cells. As we expected, ectopic expression of brain-specific markers (*npp-4* and *gpas*) extended from the posterior end of the brain to the anterior boundary of the pharynx following 14 days of *ndk* RNAi treatment (Fig. 4A,B). We then examined *sim* and *coe* mRNA expression in the pre-pharyngeal area of control and *ndk*(RNAi) animals after 14 days of RNAi; we also exposed animals from each RNAi group to a lethal dose of  $\gamma$ -irradiation to distinguish stem cell or progeny expression from differentiated neurons (Fig. 4C-E). In control animals, we consistently observed *coe*<sup>+</sup> and *sim*<sup>+</sup> cells in the pre-pharyngeal region and found that most irradiation-sensitive cells were located between the VNCs. Following *ndk* RNAi, we found there were nearly twice the number of *coe*<sup>+</sup> and ~40% more *sim*<sup>+</sup> cells between the VNCs (Fig. 4F-H). Irradiated *ndk*(RNAi) animals confirmed that the majority of the additional cells between the VNCs are stem cells or early progeny. We conclude that *coe*<sup>+</sup> and *sim*<sup>+</sup> progenitor generation is regulated by signals downstream of FGF signaling.

### Analysis of bHLH gene function in CNS regeneration

We took advantage of the experimental ease to inhibit gene function in planarians by RNAi to investigate the role of all 44 bHLH genes in planarian tissue regeneration. To screen for defects in CNS architecture and stem cell regulation, animals were stained with the pan-neuronal marker anti-SYNAPSIN and the mitotic cell marker anti-phosphohistone-H3 following dSRNA treatment (supplementary material Fig. S6A). We observed a wide range of regeneration phenotypes following RNAi knockdown of 11 bHLH genes, including lesions (*mitfl-1*), defects in CNS morphology (*arnt*, *arh*, *atoh8-1*, *coe*, *da*, *max*, *mxi-1* and *sim*) and patterning (*hesl-3* and *myoD*) (Table 1; supplementary material Fig. S6B). We did not observe obvious defects in cell division following knockdown of any bHLH gene (data not shown). *mitfl-1* was primarily detected in differentiated intestinal cells (supplementary material Fig. S2), and gene knockdown caused severe regeneration abnormalities and dorsal lesions that resulted in death, a phenotype reminiscent of defects observed after the loss of intestinal integrity (Forsthoefel et al., 2012). Consistent with previous reports, gene silencing of *ffc15* (Wagner et al., 2011) resulted in no discernible phenotype, whereas *myoD* RNAi caused regeneration blastema patterning defects (Reddien et al., 2005a).

Proneural bHLHs form heterodimers with ubiquitously expressed E proteins (such as *daughterless*, *da*) to bind DNA and function to commit progenitors to the neural fate during development (Bertrand et al., 2002). We did not observe regeneration defects following RNAi of candidate proneural gene homologs, such as *acheate-scute* or *neuroD*, which we validated by real-time quantitative PCR and found that our treatment strongly silenced each gene that we tested (supplementary material Fig. S6C). It has been shown that developmental defects are exacerbated in *Drosophila* when proneural factors are co-silenced with *da* (Goulding et al., 2000; Huang et al., 2000). Therefore, we performed double-RNAi experiments of *da* and *ascl-1*, *ascl-2*, *atoh*, *neuroD-1* or *neuroD-2*. We also co-silenced predicted bHLH paralogs to test if genes may be functionally redundant (*ascl-1;ascl-2* and *hesl-1;hesl-2* RNAi). Due to the possibility that these proteins perdure, we also conducted long-term knockdown experiments (6 weeks of RNAi treatment;

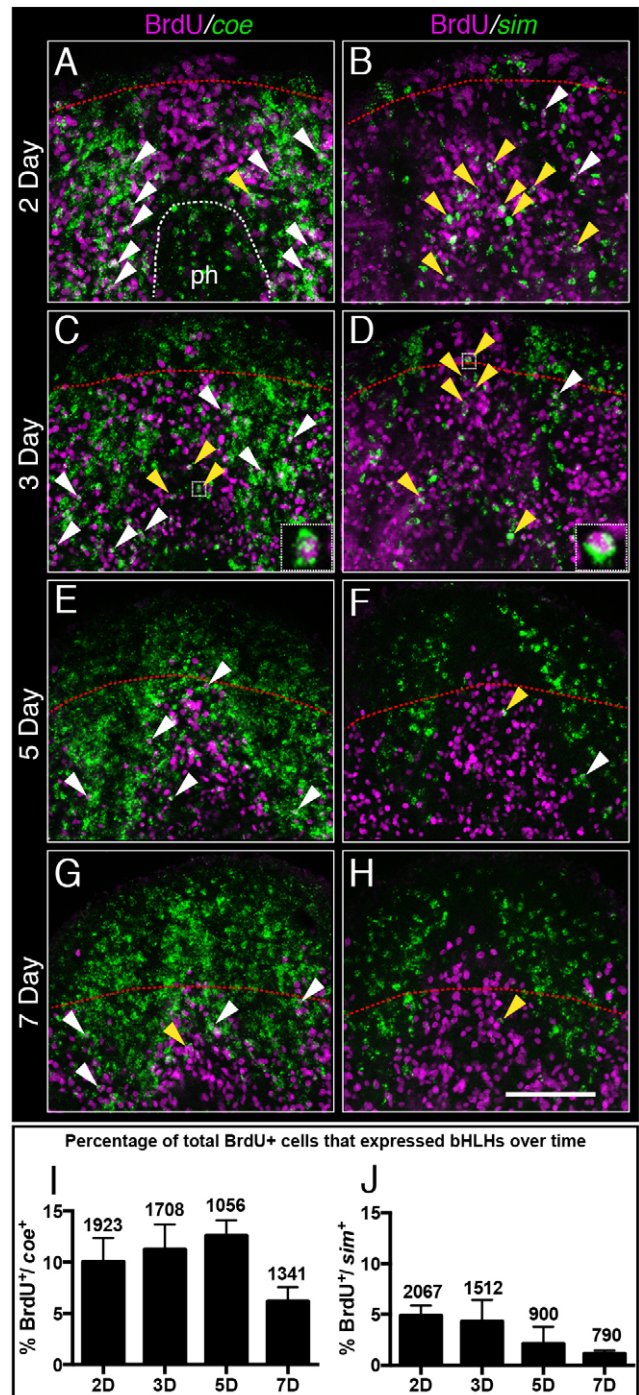

**Fig. 3. Analysis of *coe*<sup>+</sup> and *sim*<sup>+</sup> cycling cells during regeneration.** (A-H) 2, 3, 5 and 7 day regenerates were soaked in BrdU for 1 hour, chased for 4 hours, and co-labeled for *coe* or *sim* and BrdU. Red line denotes amputation site. Yellow and white arrowheads indicate *coe*<sup>+</sup>/BrdU<sup>+</sup> or *sim*<sup>+</sup>/BrdU<sup>+</sup> cells that are in the mesenchyme or in close proximity to the CNS, respectively. (I,J) Percentages of total BrdU<sup>+</sup> cells that were *coe*<sup>+</sup> or *sim*<sup>+</sup> at each time point. Numbers above each bar correspond to the total number of BrdU<sup>+</sup> cells counted. ph, pharynx. Scale bar: 100 μm.

*ascl-1*, *ascl-2*, *hesl-1*, *hesl-2*, *sim*). Neither combinatorial nor long-term RNAi experiments revealed any additional regeneration defects. However, extended knockdown experiments increased the penetrance of *sim*(RNAi) animals from ~50% to 100% ( $n=10/10$ ; data not shown).

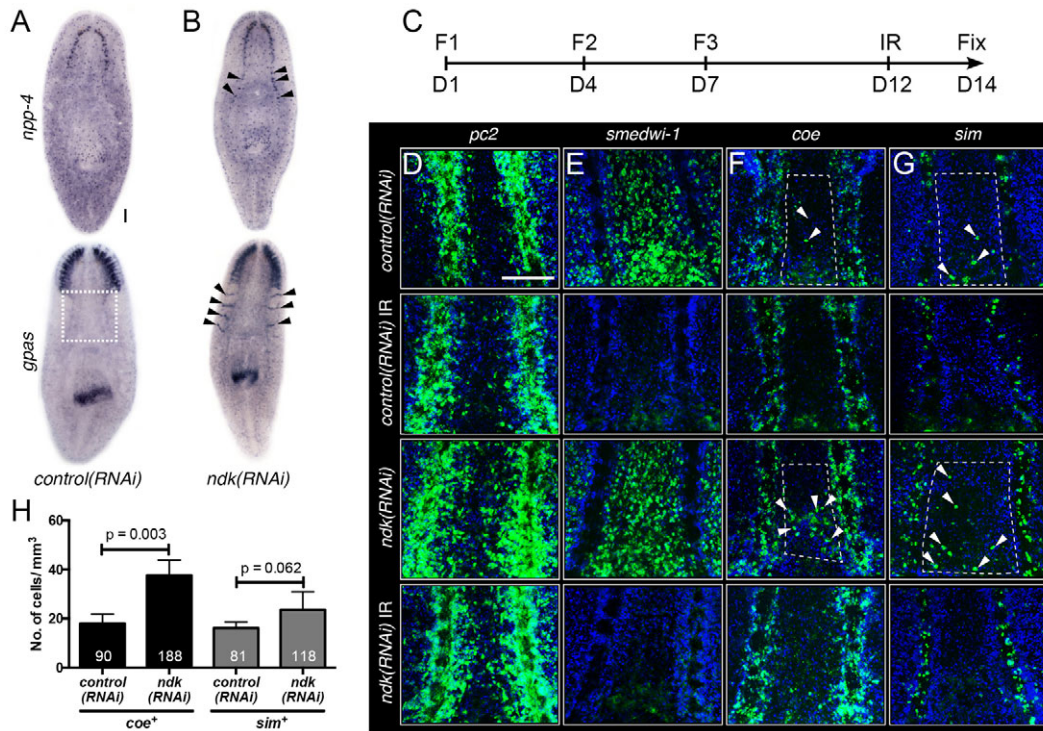

**Fig. 4. Induction of ectopic neurogenesis causes an increase in the number of *coe*<sup>+</sup> and *sim*<sup>+</sup> neurons and progenitors.** (A,B) control(RNAi) and *ndk*(RNAi) animals were processed for WISH to *npp-4* and *gpas* ( $n=10$ ). Arrows point to ectopic *npp-4*<sup>+</sup> or *gpas*<sup>+</sup> cells. White dashed box shows region imaged in D-G. (C) Schematic showing RNAi feeding (F, feeding; D, days) and  $\gamma$ -irradiation (IR) schedule for animals shown in D-G. (D-G) RNAi animals were processed for FISH to *pc2*, *smedwi-1*, *coe* or *sim* and counterstained with DAPI (blue) ( $n=15$ ). (H) Quantification of *coe*<sup>+</sup> and *sim*<sup>+</sup> progenitors within white boxed areas in F-G; total number of cells counted are indicated within each bar. Scale bars: 100  $\mu$ m.

Furthermore, we capitalized on the robust *ndk* RNAi phenotype to test the hypothesis that bHLHs required for neurogenesis would suppress ectopic nervous system expansion. We performed combinatorial RNAi experiments using *ndk*, which has been successfully used to investigate the role of other genes in planarian body patterning and CNS regeneration (Felix and Aboobaker, 2010; Iglesias et al., 2011; Blassberg et al., 2013), and screened 15 genes (*ascl-1*, *ascl-2*, *atoh*, *atoh8-1*, *coe*, *da*, *hesl-1*, -2, -3, *hlh*, *id4*, *neuroD-1*, *neuroD-2*, *sim* and *usf*) by inspecting *bHLH;ndk*(RNAi) animals for changes in *gpas* and *npp-4* expression. Induction of *gpas* expression posterior to the cephalic ganglia was not suppressed by inhibiting any of the bHLH genes together with *ndk*. However, *ascl-1;ndk*(RNAi) animals exhibited a 60% decrease in ectopic *npp-4*<sup>+</sup> cells, whereas *ndk;hesl-3*(RNAi) and *ndk;neuroD-1*(RNAi) animals exhibited a 40% decrease of ectopic *npp-4*<sup>+</sup> cells when compared with *gfp;ndk*(RNAi) animals (supplementary material Fig. S7A-G). These data suggest that *ascl-1* and *neuroD-1* may function in neural specification, but do not cause gross morphological CNS regeneration defects following gene knockdown.

#### ***coe*, *hesl-3* and *sim* are required for neuronal regeneration or maintenance**

Our RNAi screen revealed that *coe*, *hesl-3* or *sim* led to clear defects in brain regeneration (Fig. 5A-D). *coe*(RNAi) regenerates displayed photoreceptors with abnormal morphology and smaller cephalic ganglia that failed to form anterior commissures ( $n=94/114$ ; Fig. 5B). In *hesl-3*(RNAi) regenerates, the CNS was abnormally patterned, with animals regenerating a single or an ectopic eyespot and brains with abnormal morphology ( $n=20/35$ ; Fig. 5C). *sim*(RNAi) animals regenerated photoreceptors with reduced pigmentation ( $n=17/65$ ) and displayed reduced density of the brain neuropil ( $n=30/65$ ; Fig. 5D). Gene knockdown of *arnt* or *sim* resulted in similar regeneration defects and these genes have been shown to interact with each other (Probst et al., 1997). Hence, we also tested the effect of co-silencing *sim* and *arnt*; however,

*sim;arnt*(RNAi) did not increase the severity of the phenotype above single RNAi treatments (data not shown). The *coe*, *hesl-3* and *sim* knockdown phenotypes, together with the expression of these genes in progenitors and neurons (Figs 1-3), led us to further investigate their potential roles in neuronal regeneration and homeostasis.

Next, we examined the specific roles of *coe*, *hesl-3* and *sim* in nervous system differentiation by evaluating the effect of gene knockdown on the expression of neuronal subtype-specific genes (Fig. 5E-H). We selected the neural marker *ChAT*, which is broadly expressed in the CNS and was co-detected with *coe*<sup>+</sup>, *hesl-3*<sup>+</sup> and *sim*<sup>+</sup> cells (Fig. 1J-L), and *cyp-1*, *npp-4* and *npv-2*, which are strongly expressed in neuropeptidergic neurons in the brain (Collins et al., 2010). Using *ChAT* staining we measured the brain area of 7-day regenerates and found that *coe* and *sim* RNAi animals regenerated smaller brains (Fig. 5I). In addition, we observed a significant reduction of *cyp-1*<sup>+</sup> cells in *coe*(RNAi) animals (Fig. 5F,J) and of *npp-4*<sup>+</sup> and *npv-2*<sup>+</sup> cells in *coe*(RNAi) and *sim*(RNAi) animals (Fig. 5F,H,K,L). Furthermore, we observed *ChAT*<sup>+</sup>, *npv-2*<sup>+</sup> and *npp-4*<sup>+</sup> cells in aberrant locations following *coe* RNAi (Fig. 5F). Although the brain area difference in *hesl-3*(RNAi) regenerates was not statistically significant, we did detect fewer *cyp-1*<sup>+</sup>, *npp-4*<sup>+</sup> and *npv-2*<sup>+</sup> neurons (Fig. 5G,I-L). Due to the fact that we observed CNS patterning-like defects in *coe*(RNAi) and *hesl-3*(RNAi) animals, we tested whether these abnormalities were caused by defects in the stem cells (*smedwi-1*), progeny (*NB.32.Ig*, early progeny; *agat-1*, late progeny) or midline signals (*slit* expression) (Cebrià et al., 2007), but we did not find obvious changes in the expression of these markers after *coe* or *hesl-3* RNAi (supplementary material Fig. S8A-C). These data demonstrate that *coe*, *hesl-3* and *sim* are required for expression of neuronal-specific genes and may be necessary for the replacement of neurons following injury. In combination with our expression analyses, these data suggest that *coe*, *hesl-3* and *sim* are expressed in a subset of stem cells committed to neural fates and their function is crucial for neural progenitor maintenance or differentiation.



**Table 1. Summary of phenotypes observed following RNAi of bHLH homologs in *S. mediterranea***

| Gene name                                                    | Gene symbol    | Phenotype                                                                                      | Developmental role                                |
|--------------------------------------------------------------|----------------|------------------------------------------------------------------------------------------------|---------------------------------------------------|
| <i>aryl hydrocarbon receptor</i>                             | <i>arh</i>     | Reduced brain neuropil density (14/20)                                                         | B-cell and nervous system differentiation         |
| <i>aryl hydrocarbon receptor nuclear translocator</i>        | <i>arnt</i>    | Delayed regeneration and reduced brain neuropil density (12/40)                                | Differentiation of multiple cell types            |
| <i>atonal homolog 8-1</i>                                    | <i>atoh8-1</i> | Delayed regeneration and smaller cg (19/35)                                                    | Nervous system differentiation                    |
| <i>collier/olfactory-1/early B-cell factor</i>               | <i>coe</i>     | Abnormal pr morphology, flattened morphology, and failure of cg to reconnect (94/114)          | B-cell, muscle and nervous system differentiation |
| <i>daughterless</i>                                          | <i>da</i>      | Ruffled body margin edges and reduced cg neuropil (70/70)                                      | Neurogenesis, oogenesis and sex determination     |
| <i>hairy and enhancer of split like-3</i>                    | <i>hesl-3</i>  | Abnormal pr morphology; single or third pr (20/35)                                             | Negative regulation of Notch signaling            |
| <i>max-interactor-1</i>                                      | <i>mxi-1</i>   | Abnormal pr morphology (13/40), expanded and disorganized cg (20/40)                           | Negative regulation of cell proliferation         |
| <i>microphthalmia-associated transcription factor like-1</i> | <i>mitf1-1</i> | Lysis (8/40), smaller and disorganized cg (12/40)                                              | Osteoclast differentiation                        |
| <i>myc associated factor X</i>                               | <i>max</i>     | Lighter pr and smaller cg (15/20)                                                              | Negative regulation of gene expression            |
| <i>myogenic differentiation</i>                              | <i>myoD</i>    | Failure to regenerate (8/30), abnormal pr morphology; cyclops or bowtie-shaped pr pair (14/30) | Mesoderm specification                            |
| <i>single-minded</i>                                         | <i>sim</i>     | Reduced pr pigmentation (17/65) and cg neuropil density (30/65)                                | Axon guidance, nervous system differentiation     |

The number of animals showing the phenotype(s) among the total number examined is indicated in parentheses. cg, cephalic ganglia; pr, photoreceptor.

Planarians continuously replace cells during normal tissue homeostasis. Therefore, we also assessed the roles of *coe*, *hesl-3* and *sim* in nervous system maintenance by performing extended RNAi treatments (6 weeks) on intact planarians. Knockdown of *hesl-3* and *sim* resulted in no external phenotype or alterations in CNS architecture (data not shown). By contrast, long-term *coe* RNAi resulted in a strong behavioral phenotype in which animals exhibited impaired negative phototaxis and a flattened and stretched body shape with ruffling along the body margin (Fig. 5M; supplementary material Movies 1, 2). Analysis of *ChAT*<sup>+</sup> and *pc2*<sup>+</sup> neurons in *coe*(RNAi) animals showed that the CNS appeared largely intact except for the absence of *ChAT*<sup>+</sup> and *pc2*<sup>+</sup> neurons located at the anterior brain commissure (Fig. 5N). This phenotype was reminiscent of the defect observed in *coe* knockdown regenerates, in which the brain fails to reconnect (Fig. 5B). Because *coe*(RNAi) regenerates showed a dramatic reduction of *cpp-1*<sup>+</sup> brain neurons, we examined whether this cell population was also affected in uninjured *coe*(RNAi) animals. Strikingly, we observed an 80% reduction in the number of *cpp-1*<sup>+</sup> cells in *coe*(RNAi) planarians (Fig. 5O,P). Furthermore, when we performed dFISH to *coe* and *cpp-1*, we found that a majority of *cpp-1*<sup>+</sup> cells also expressed *coe* (81±1.3%; Fig. 5Q). Taken together, our data indicate that *coe* is required for normal function and maintenance of neural tissues and strongly suggest that *cpp-1* may be downstream of *coe*.

## DISCUSSION

Although it has been demonstrated that planarians possess pluripotent stem cells (Baguña et al., 1989; Wagner et al., 2011; Guedelhoefer and Sánchez Alvarado, 2012), several studies support the hypothesis that the stem cell population is heterogeneous (Elliott and Sánchez Alvarado, 2013; Reddien, 2013; Rink, 2013). Analyses of the planarian photoreceptor, excretory and serotonergic cells have shown that tissue-specific transcription factors are detected in the stem cells in intact (Lapan and Reddien, 2012) and regenerating tissues (Lapan and Reddien, 2011; Scimone et al., 2011; Currie and Pearson, 2013); these studies have identified the first sets of precursor cells in planarians outside of the germ cells (Newmark et al., 2008) and have generated a working model in which planarians possess diverse lineage-committed progenitors that contribute to the

maintenance and regeneration of tissues (Reddien, 2013; Rink, 2013). In contrast to the well-defined excretory system and photoreceptors, the nervous system represents a formidable challenge. At the molecular level, there are potentially dozens of neuronal subtypes (Cebrià, 2007; Collins et al., 2010; Gentile et al., 2011; Umesono et al., 2011), and it is largely unknown whether the generation of neural diversity is solely dependent on the pluripotent stem cells or lineage-restricted progenitors. In our study, we investigated this question by analyzing the bHLH gene family. By combining *in situ* hybridization analyses and RNAi studies, we identified nine bHLH genes expressed in specific neural and stem cell subpopulations that were required for regeneration (Fig. 6A), which strongly suggested that these phenotypes could be due to abnormal neural differentiation and/or function.

## Identification of neuronal progenitor cells in planarians

Owing to the mRNA expression in stem cells and neurons, we focused our analyses on *coe*, *hesl-3* and *sim*, which are known to serve major roles in neurogenesis in both vertebrate and invertebrate organisms (Dubois and Vincent, 2001; Kewley et al., 2004; Kageyama et al., 2008). As we expected, using BrdU, we observed *coe*, *hesl-3* and *sim* expression in cycling stem cells located in the mesenchyme of intact animals. Over the course of 48 hours, we observed an increase in the proportion of BrdU<sup>+</sup> cells that expressed *coe* and *sim* and detected many of these cells in the cephalic ganglia. We hypothesize that the observed increase in the proportion of BrdU<sup>+</sup>/*coe*<sup>+</sup> and BrdU<sup>+</sup>/*sim*<sup>+</sup> cells over time is from both progenitors that maintain expression of *coe* or *sim* as they divide and begin to differentiate and additional cells that turn on expression of these genes during differentiation. Additionally, the increase in the proportion of double-labeled cells could also be accounted for by a contribution of newly generated progenitor cells. Together with the observation that the number of *coe*<sup>+</sup> and *sim*<sup>+</sup> cells increases following induction of ectopic neurogenesis and the requirement of *coe* and *sim* during CNS regeneration (RNAi studies discussed below), our data suggest that a subset of *coe*- and *sim*-expressing cells represent multipotent neural progenitors (Fig. 6B). We propose that these *coe*<sup>+</sup> and *sim*<sup>+</sup> progenitors migrate and terminally differentiate in the CNS. By contrast, we did not observe an increase

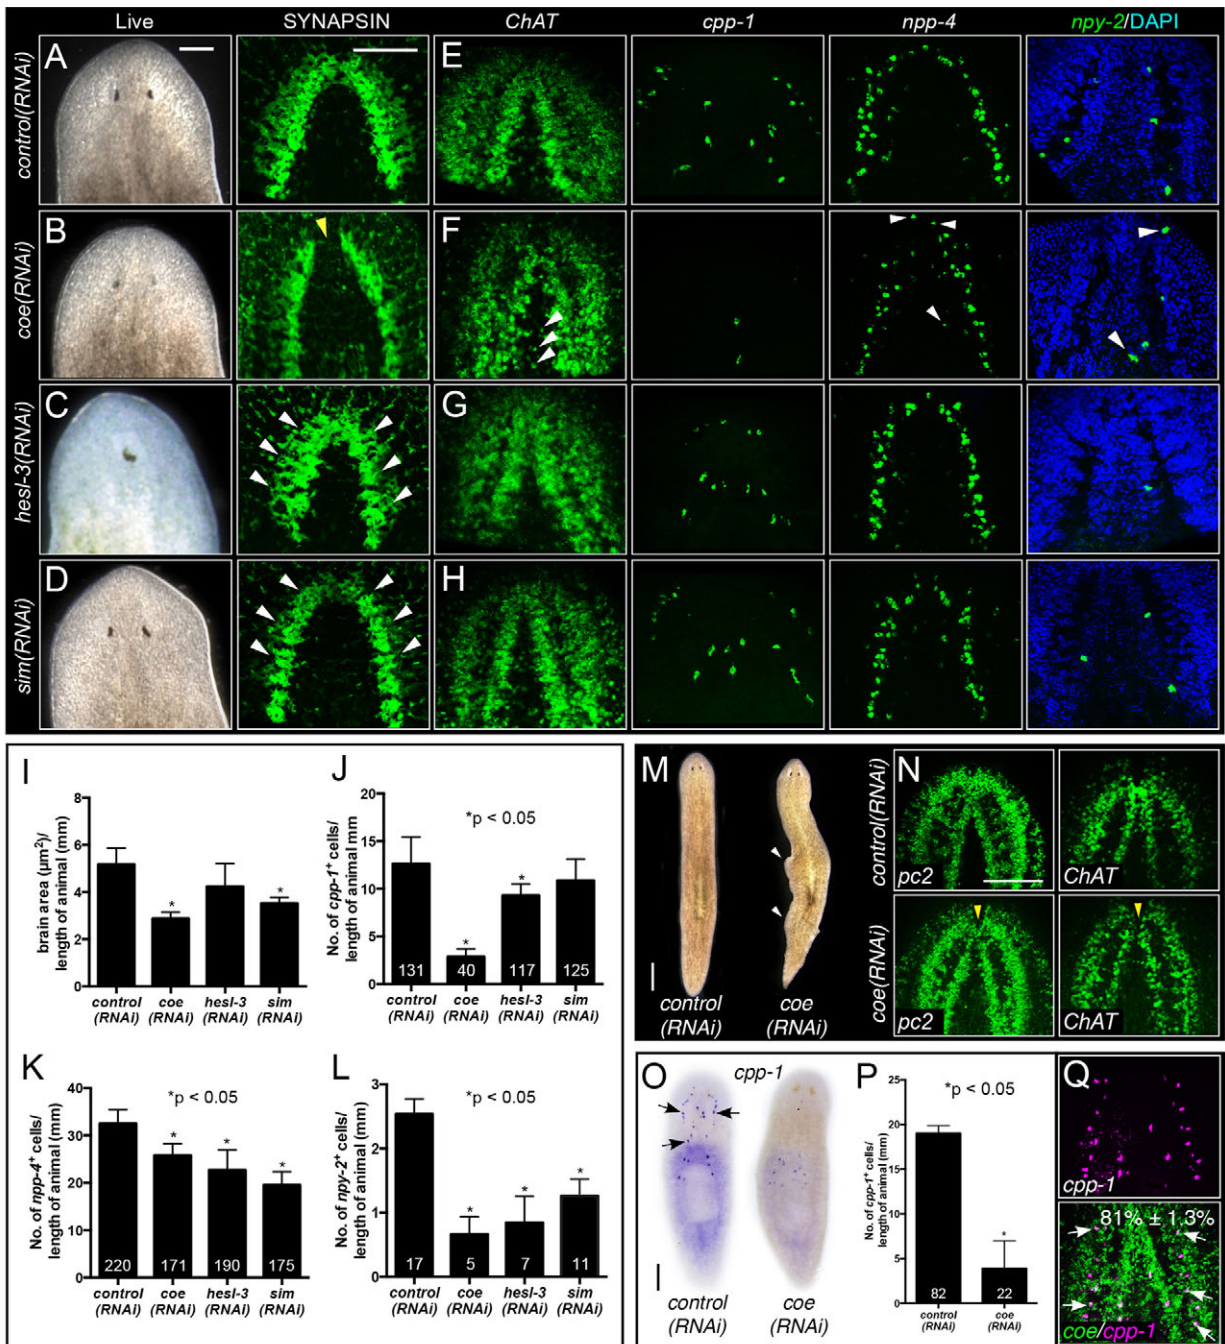

**Fig. 5. *coe*, *hesl-3* and *sim* are required for CNS regeneration.** (A-D) Images of live or immunostained RNAi-treated animals after 10 days of regeneration. The yellow arrowhead in B marks a commissure defect, and white arrowheads in C and D mark the abnormal brain morphology and a dramatic reduction of neuropil density observed in *hesl-3* and *sim* RNAi planarians, respectively. (E-H) Seven days following amputation, RNAi animals were processed for FISH to *ChAT*, *cpp-1*, *npp-4* or *npy-2* ( $n=20$ ). Arrowheads in F denote aberrant location of *npp-4*<sup>+</sup> and *npy-2*<sup>+</sup> neurons (the latter were counterstained with DAPI to visualize the brain). (I-L) Quantification of neurons shown in E-H; the total number of cells counted are indicated within each bar. (M-O) After 24 days of RNAi treatment uninjured control and *coe*(RNAi) animals were imaged live (M) or processed for FISH to *pc2* or *ChAT* (N;  $n=10$ ) or WISH to *cpp-1* (O;  $n=15$ ). (P) Quantification of *cpp-1*<sup>+</sup> cells in O. (Q) FISH to *cpp-1* and *coe*, and quantification of *cpp-1*<sup>+</sup> cells that also expressed *coe*. Scale bars: 100  $\mu\text{m}$ .

in the proportion of  $\text{BrdU}^+/\text{hesl-3}^+$  cells near the brain; it is possible that *hesl-3* expression is downregulated during cell-fate specification and that this gene may be regulating progenitor maintenance or the timing of neural stem cell differentiation, scenarios that are consistent with known roles of HES genes (Hatakeyama et al., 2004; Kageyama et al., 2008). Although some *coe*<sup>+</sup> and *sim*<sup>+</sup> cells were observed in the posterior end of the animal, neural progenitors were

most prevalent in the area anterior to the pharynx and posterior to the base of the brain, the location where eye progenitors (*ovo*<sup>+</sup>/*smedwi-1*<sup>+</sup> cells) were also detected (Lapan and Reddien, 2012). Interestingly, our observation that the proportion of  $\text{BrdU}^+/\text{coe}^+$  and  $\text{BrdU}^+/\text{sim}^+$  cells located in the pre-pharyngeal area increased over time suggests that this area may represent a 'neurogenic zone' in planarians. Our data support a model in which



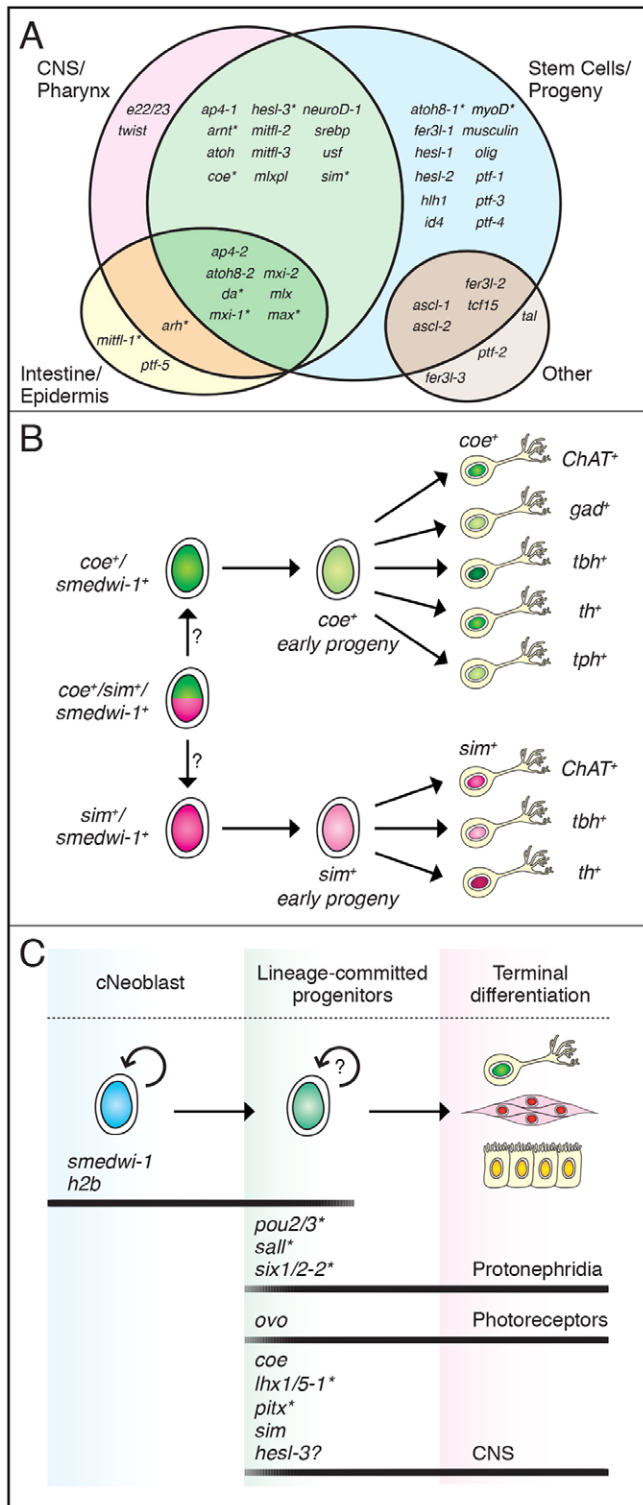

**Fig. 6. Planarians possess lineage-committed neural progenitors.** (A) Venn diagram summarizing genome-wide expression and functional analysis of bHLH genes in planarians. \*Regeneration defects were observed following RNAi. (B) Model of *coe*<sup>+</sup> and *sim*<sup>+</sup> progenitor cell differentiation into specific neural subtypes. (C) Model of cell differentiation in planarians. Pluripotent adult stem cells (cNeoblasts; *smedwi-1*<sup>+</sup> and *h2b*<sup>+</sup>) have the ability to self-renew and generate lineage-committed progenitors. Summary of identified genes marking photoreceptor (Lapan and Reddien, 2012), protonephridia (Scimone et al., 2011), serotonergic (Currie and Pearson, 2013) and novel CNS (bHLH) progenitors, respectively. \*Progenitors that are only observed during regeneration.

pluripotent stem cells (cNeoblasts) maintain lineage-committed progenitors, which generate most if not all of the cells required to meet normal physiological demands in uninjured planarians (Fig. 6C).

### bHLH genes with roles in planarian CNS regeneration

Planarians possess members from all of the families of proneural factors, including homologs of *acheate-scute*, *atonal*, *neuroD* and *da*, all of which are primarily expressed in the stem cells. With the exception of *atoh8-1* RNAi, which caused animals to regenerate smaller brains, we found that gene knockdown of most proneural homologs failed to cause overt regeneration defects, even after long-term or combinatorial RNAi. Nonetheless, we did find that co-silencing of *ascl-1* or *neuroD-1* together with *ndk* suppressed ectopic formation of *npp-4*<sup>+</sup> neurons. We surmise that knockdown of some bHLHs may cause subtle defects in neural specification, which are difficult to detect with the use of pan-neural markers. Future functional studies using discrete nervous system markers may reveal additional roles of bHLH genes in CNS differentiation.

On the bases of gene expression patterns and RNAi phenotypes, we further explored the function of *coe*, *hesl-3* and *sim*. *coe* genes are conserved in metazoans and are known to play roles in neuronal specification, migration, axon guidance, dendritogenesis, neuronal subtype specification (Wightman et al., 1997; Dubois et al., 1998; Prasad et al., 1998; Garel et al., 2000; Pozzoli et al., 2001; Garcia-Dominguez et al., 2003; Hattori et al., 2007; Jinushi-Nakao et al., 2007; Crozatier and Vincent, 2008; Demilly et al., 2011; Kratsios et al., 2012), and cellular reprogramming (Richard et al., 2011). In planarians, *coe* knockdown led to a failure of animals to connect the cephalic ganglia. Analysis of this defect using neural subtype markers showed that neurons were found in aberrant locations. In addition, long-term silencing caused animals to exhibit abnormal locomotion and decreases of cholinergic and *pc2*<sup>+</sup> neurons at the anterior commissure and brain *cpp-1*<sup>+</sup> neurons. In *C. elegans*, *coe* (*unc-3*) mutants exhibit behavioral abnormalities (Wightman et al., 1997), a defect that is caused by a loss of cholinergic motoneuron properties (Kratsios et al., 2012). Our data show that *coe* is playing a conserved role in neuronal differentiation during both CNS regeneration and maintenance. *coe* homologs in humans (EBF transcription factors) have been associated with cancers of the nervous system (Liao, 2009), yet the genetic targets of *coe* homologs have not been fully characterized. Thus, further investigation of *coe* function in planarians may reveal mechanisms regulating neural progenitor populations.

*hes* genes are a primary target of Notch signaling and defects in *hes* genes cause premature neural differentiation and depletion of the neural progenitor pool in mice (Ishibashi et al., 1995; Kageyama et al., 2008). In planarians, *hesl-3* knockdown led animals to regenerate mispatterned brains and a reduction of *cpp-1*<sup>+</sup>, *npp-4*<sup>+</sup> and *npy-2*<sup>+</sup> brain neurons. These data suggest *hesl-3* plays a role in neural fate regulation during CNS repair. At present, the role of Notch signaling in planarians has not been extensively characterized. Thus, analysis of *hesl* genes in stem cell regulation should be a focus of future investigations.

Finally, in flies and crustaceans, *sim* functions as a master regulator of midline cells by regulating the specification of midline progenitors (Nambu et al., 1991; Vargas-Vila et al., 2010), whereas in vertebrates, *sim* controls the differentiation (Michaud et al., 1998; Eaton and Glasgow, 2006) and migration (via plexinC1) (Xu and Fan, 2007) of certain neuroendocrine lineages. *sim* does not appear to function as a master regulator of the midline in planarians. However, *sim* RNAi caused animals to regenerate smaller brains

with fewer *npp-4<sup>+</sup>* and *npv-2<sup>+</sup>* neurons, suggesting a potential role in specification and/or guidance of cells from the neuroendocrine lineage. To further explore this possibility, future experiments should test the effects of *sim* knockdown on the fate of all neuropeptide-expressing neurons (Collins et al., 2010) or the expression of guidance molecules, such as plexin homologs.

### Conclusions

Our work has revealed that planarians possess lineage-committed progenitors that contribute to the maintenance and regeneration of the CNS. We also identified nine bHLH genes that regulate adult neurogenesis and are required for nervous system repair. This study sets the stage to use planarians as a model to elucidate roles of bHLH genes in adult pluripotent stem cell differentiation. Furthermore, by extending our analysis of bHLH factors genome-wide, this study will serve as a resource for future investigation into bHLH evolution and function.

## MATERIALS AND METHODS

### Animals

Asexual *Schmidtea mediterranea* (CIW4) were maintained as previously described (Cebrià and Newmark, 2005). Animals 2–5 mm in length that were starved for 1 week were used for all experiments.

### bHLH identification, phylogenetic analysis and cloning

To identify planarian bHLH genes, TBLASTN searches were performed against the *S. mediterranea* genome (Robb et al., 2008) and several transcriptomes (Zayas et al., 2005; Adamidi et al., 2011; Labbé et al., 2012; Ónal et al., 2012) using bHLH protein sequences from human, mouse and fly. Putative planarian bHLH homologs were validated by performing reciprocal BLASTX against the nr database (NCBI). The bHLH superfamily consists of six monophyletic groups (Groups A–F), which are also characterized by the presence or absence of various additional protein domains (Simionato et al., 2007). Due to the large number of putative paralogs in Groups A and B, the predicted protein sequences were aligned using T-Coffee (Notredame et al., 2000) and subjected to Bayesian analyses as described previously (Currie and Pearson, 2013; Zhu and Pearson, 2013); Group C–F genes were categorized based on clear top BLASTP hits against the Swiss-Prot database (UniProt) and the presence of class-specific protein domains (supplementary material Table S1). bHLH sequences were obtained from a cDNA collection (Zayas et al., 2005) or cloned from cDNA into pJC53.2 (Collins et al., 2010) or pPR244 (Reddien et al., 2005a) using gene specific primers or 3' RACE, respectively. bHLH sequences were deposited in GenBank. The primers used and GenBank accession numbers are listed in supplementary material Table S2.

### In situ hybridization

Riboprobes were synthesized and animals were processed for *in situ* hybridization as previously described (Pearson et al., 2009). For  $\gamma$ -irradiation treatments, animals were exposed to 100 Gy in a JL Shepherd Mark I Cesium-137 irradiator and fixed 6 days after treatment. To visualize bHLH transcripts by multiple fluorescent *in situ* hybridization (FISH), we used horseradish peroxidase substrates as described previously (Pearson et al., 2009) or the alkaline phosphatase (AP) substrate Fast Blue (Lauter et al., 2011; Currie and Pearson, 2013). For Fast Blue staining, animals were developed in 0.25 mg/ml Fast Blue BB (Sigma F3378) and NAMP (Sigma 855) in AP staining buffer (0.1 M Tris-HCl pH 8.2, containing 50 mM MgCl<sub>2</sub>, 100 mM NaCl, 0.1% Tween 20) (Hauptmann, 2001; Lauter et al., 2011).

### BrdU staining

Experiments were conducted by soaking animals in BrdU for 1 hour as previously described (Cowles et al., 2012), chasing for 4, 24 or 48 hours before fixation and processing for FISH, and then processing for BrdU labeling starting with the HCl treatment.

### RNA interference

For regeneration studies, we administered six feedings of bacterially expressed dsRNA over 3 weeks as previously described (Gurley et al., 2008). *gfp* was used as a control for all experiments. 24 hours following the final RNAi treatment, animals were amputated anterior to the pharynx, observed for 10 days and then processed for *in situ* hybridization or immunostaining. For long-term experiments, animals were fed 12 times over 6 weeks before amputation; uninjured animals were fixed 1 week after the final feeding. Relative gene expression after RNAi was determined by real-time quantitative PCR as described previously (Hubert et al., 2013); primers are listed in supplementary material Table S2.

### Immunohistochemistry

Immunostaining with anti-SYNAPSIN (1:400, 3C10, Developmental Studies Hybridoma Bank) and anti-phosphohistone-H3 (S10) (1:1000, D2C8, Cell Signaling) were performed as previously described (Cowles et al., 2012).

### Imaging

Images were acquired using a Leica DFC450 camera mounted on a Leica M205 stereomicroscope. Animals labeled with fluorescent probes were imaged with an AxioCam MRm camera mounted on a Zeiss SteREO Lumar V.12 or Axio Observer.Z1 equipped with an ApoTome, or a Hamamatsu Imagem C9100-13 camera mounted on an Olympus IX81 microscope equipped with a Yokogawa CSU X1 spinning-disk confocal scan head.

### Cell counting

Ten 1- $\mu$ m optical sections were captured from selected regions and merged, and cells were hand-counted using ImageJ 1.43u software. The proportions of cells co-expressing specific neurotransmitters or *smadwi-1* and *coe*, *hesl-3* or *sim* were calculated from >100 cells counted from three to five animals. The proportion of BrdU<sup>+</sup> cells co-expressing specific genes was calculated from >300 BrdU<sup>+</sup> cells counted from three to five animals. For analysis of *ndk* RNAi animals, *coe*<sup>+</sup> and *sim*<sup>+</sup> cells were counted and normalized per mm<sup>3</sup>; ectopic *npp-4<sup>+</sup>* cells were counted from the posterior end of the brain to the posterior boundary of the pharynx and normalized to the length of the animal. Mean and s.d. values were computed and statistical comparisons were performed using an unpaired Student's *t*-test. Error bars in graphs are s.d.

### Acknowledgements

We thank Jordana Henderson, Amy Hubert and Kelly Ross for helpful comments on the manuscript, Kayla Muth for assistance with RNAi experiments, Claire Cowles for artwork design, and the anonymous reviewers whose constructive criticisms improved this work.

### Competing interests

The authors declare no competing financial interests.

### Author contributions

M.W.C. and R.M.Z. designed and interpreted the experiments and wrote the manuscript. M.W.C., D.D.R.B., S.V.N. and B.N.S. conducted the experiments and analyzed the data. B.J.P. performed phylogenetic analysis. M.W.C., B.J.P. and R.M.Z. discussed the results and edited the final version of the manuscript.

### Funding

M.W.C. acknowledges support from the San Diego Chapter of the Achievement Rewards for College Scientists Foundation and the Inamori Foundation. D.D.R.B. was supported by a Canadian Institutes of Health Research Student Fellowship [GSD-121763]. This research was supported by a Natural Sciences and Engineering Research Council of Canada grant [402264-11] and Ontario Institute for Cancer Research New Investigator Award [IA-026] to B.J.P. and a California Institute for Regenerative Medicine grant [RN2-00940-1] to R.M.Z.

### Supplementary material

Supplementary material available online at <http://dev.biologists.org/lookup/suppl/doi:10.1242/dev.098616/-DC1>

### References

Adamidi, C., Wang, Y., Gruen, D., Mastrobuoni, G., You, X., Tolle, D., Dodt, M., Mackowiak, S. D., Gogol-Doering, A., Oenal, P. et al. (2011). De novo assembly



- and validation of planaria transcriptome by massive parallel sequencing and shotgun proteomics. *Genome Res.* **21**, 1193-1200.
- Baguña, J.** (2012). The planarian neoblast: the rambling history of its origin and some current black boxes. *Int. J. Dev. Biol.* **56**, 19-37.
- Baguña, J., Saló, E. and Auladell, C.** (1989). Regeneration and pattern formation in planarians. III. Evidence that neoblasts are totipotent stem cells and the source of blastema cells. *Development* **107**, 77-86.
- Bertrand, N., Castro, D. S. and Guillemot, F.** (2002). Proneural genes and the specification of neural cell types. *Nat. Rev. Neurosci.* **3**, 517-530.
- Blassberg, R. A., Felix, D. A., Tejada-Romero, B. and Aboobaker, A. A.** (2013). PBX/extradenticle is required to re-establish axial structures and polarity during planarian regeneration. *Development* **140**, 730-739.
- Bullock, T. H. and Horridge, G. A.** (1965). *Structure and Function in the Nervous Systems of Invertebrates*. San Francisco, CA, USA: W. H. Freeman.
- Cebrià, F.** (2007). Regenerating the central nervous system: how easy for planarians! *Dev. Genes Evol.* **217**, 733-748.
- Cebrià, F. and Newmark, P. A.** (2005). Planarian homologs of netrin and netrin receptor are required for proper regeneration of the central nervous system and the maintenance of nervous system architecture. *Development* **132**, 3691-3703.
- Cebrià, F., Kobayashi, C., Umesono, Y., Nakazawa, M., Mineta, K., Ikeo, K., Gojobori, T., Itoh, M., Taira, M., Sánchez Alvarado, A. et al.** (2002). FGFR-related gene *nou-darake* restricts brain tissues to the head region of planarians. *Nature* **419**, 620-624.
- Cebrià, F., Guo, T., Jopek, J. and Newmark, P. A.** (2007). Regeneration and maintenance of the planarian midline is regulated by a slit orthologue. *Dev. Biol.* **307**, 394-406.
- Collins, J. J., 3rd, Hou, X., Romanova, E. V., Lambrus, B. G., Miller, C. M., Saberi, A., Sweedler, J. V. and Newmark, P. A.** (2010). Genome-wide analyses reveal a role for peptide hormones in planarian germline development. *PLoS Biol.* **8**, e1000509.
- Cowles, M. W., Hubert, A. and Zayas, R. M.** (2012). A Lissencephaly-1 homologue is essential for mitotic progression in the planarian *Schmidtea mediterranea*. *Dev. Dyn.* **241**, 901-910.
- Crozatier, M. and Vincent, A.** (2008). Control of multidendritic neuron differentiation in *Drosophila*: the role of Collier. *Dev. Biol.* **315**, 232-242.
- Currie, K. W. and Pearson, B. J.** (2013). Transcription factors *lhx1/5-1* and *pix* are required for the maintenance and regeneration of serotonergic neurons in planarians. *Development* **140**, 3577-3588.
- Demilly, A., Sionato, E., Ohayon, D., Kerner, P., Garcès, A. and Vervoort, M.** (2011). *Coe* genes are expressed in differentiating neurons in the central nervous system of protostomes. *PLoS ONE* **6**, e21213.
- Dubois, L. and Vincent, A.** (2001). The *COE-Collier/Olf1/EBF*-transcription factors: structural conservation and diversity of developmental functions. *Mech. Dev.* **108**, 3-12.
- Dubois, L., Bally-Cuif, L., Crozatier, M., Moreau, J., Paquereau, L. and Vincent, A.** (1998). *XCoe2*, a transcription factor of the *Col/Olf-1/EBF* family involved in the specification of primary neurons in *Xenopus*. *Curr. Biol.* **8**, 199-209.
- Eaton, J. L. and Glasgow, E.** (2006). The zebrafish bHLH PAS transcriptional regulator, single-minded 1 (*sim1*), is required for isotocin cell development. *Dev. Dyn.* **235**, 2071-2082.
- Eisenhoffer, G. T., Kang, H. and Sánchez Alvarado, A.** (2008). Molecular analysis of stem cells and their descendants during cell turnover and regeneration in the planarian *Schmidtea mediterranea*. *Cell Stem Cell* **3**, 327-339.
- Elliott, S. A. and Sánchez Alvarado, A.** (2013). The history and enduring contributions of planarians to the study of animal regeneration. *Wiley Interdiscip. Rev. Dev. Biol.* **2**, 301-326.
- Felix, D. A. and Aboobaker, A. A.** (2010). The TALE class homeobox gene *Smed-prep* defines the anterior compartment for head regeneration. *PLoS Genet.* **6**, e1000915.
- Forsthöfel, D. J., Park, A. E. and Newmark, P. A.** (2011). Stem cell-based growth, regeneration, and remodeling of the planarian intestine. *Dev. Biol.* **356**, 445-459.
- Forsthöfel, D. J., James, N. P., Escobar, D. J., Stary, J. M., Vieira, A. P., Waters, F. A. and Newmark, P. A.** (2012). An RNAi screen reveals intestinal regulators of branching morphogenesis, differentiation, and stem cell proliferation in planarians. *Dev. Cell* **23**, 691-704.
- Gage, F. H.** (2002). Neurogenesis in the adult brain. *J. Neurosci.* **22**, 612-613.
- Galliot, B., Quiquand, M., Ghila, L., de Rosa, R., Mijlkovic-Licina, M. and Chera, S.** (2009). Origins of neurogenesis, a cnidarian view. *Dev. Biol.* **332**, 2-24.
- García-Domínguez, M., Poquet, C., Garel, S. and Charnay, P.** (2003). *Ebf* gene function is required for coupling neuronal differentiation and cell cycle exit. *Development* **130**, 6013-6025.
- Garel, S., García-Domínguez, M. and Charnay, P.** (2000). Control of the migratory pathway of facial branchiomotor neurones. *Development* **127**, 5297-5307.
- Gentile, L., Cebrià, F. and Bartscherer, K.** (2011). The planarian flatworm: an in vivo model for stem cell biology and nervous system regeneration. *Dis. Model. Mech.* **4**, 12-19.
- Goulding, S. E., zur Lage, P. and Jarman, A. P.** (2000). *amos*, a proneural gene for *Drosophila* olfactory sense organs that is regulated by *lozenge*. *Neuron* **25**, 69-78.
- Guedelhoefer, O. C., 4th and Sánchez Alvarado, A.** (2012). Amputation induces stem cell mobilization to sites of injury during planarian regeneration. *Development* **139**, 3510-3520.
- Guillemot, F.** (2007). Spatial and temporal specification of neural fates by transcription factor codes. *Development* **134**, 3771-3780.
- Gurley, K. A., Rink, J. C. and Sánchez Alvarado, A.** (2008). Beta-catenin defines head versus tail identity during planarian regeneration and homeostasis. *Science* **319**, 323-327.
- Hatakeyama, J., Bessho, Y., Katoh, K., Ookawara, S., Fujioka, M., Guillemot, F. and Kageyama, R.** (2004). *Hes* genes regulate size, shape and histogenesis of the nervous system by control of the timing of neural stem cell differentiation. *Development* **131**, 5539-5550.
- Hattori, Y., Sugimura, K. and Uemura, T.** (2007). Selective expression of *Knot/Collier*, a transcriptional regulator of the *EBF/Olf-1* family, endows the *Drosophila* sensory system with neuronal class-specific elaborated dendritic patterns. *Genes Cells* **12**, 1011-1022.
- Hauptmann, G.** (2001). One-, two-, and three-color whole-mount in situ hybridization to *Drosophila* embryos. *Methods* **23**, 359-372.
- Huang, M. L., Hsu, C. H. and Chien, C. T.** (2000). The proneural gene *amos* promotes multiple dendritic neuron formation in the *Drosophila* peripheral nervous system. *Neuron* **25**, 57-67.
- Hubert, A., Henderson, J. M., Ross, K. G., Cowles, M. W., Torres, J. and Zayas, R. M.** (2013). Epigenetic regulation of planarian stem cells by the *SET1/MLL* family of histone methyltransferases. *Epigenetics* **8**, 79-91.
- Iglesias, M., Almuedo-Castillo, M., Aboobaker, A. A. and Saló, E.** (2011). Early planarian brain regeneration is independent of blastema polarity mediated by the *Wnt/β-catenin* pathway. *Dev. Biol.* **358**, 68-78.
- Ishibashi, M., Ang, S. L., Shiota, K., Nakanishi, S., Kageyama, R. and Guillemot, F.** (1995). Targeted disruption of mammalian hairy and Enhancer of split homolog-1 (*HES-1*) leads to up-regulation of neural helix-loop-helix factors, premature neurogenesis, and severe neural tube defects. *Genes Dev.* **9**, 3136-3148.
- Jan, Y. N. and Jan, L. Y.** (1994). Neuronal cell fate specification in *Drosophila*. *Curr. Opin. Neurobiol.* **4**, 8-13.
- Jinushi-Nakao, S., Arvind, R., Amikura, R., Kinameri, E., Liu, A. W. and Moore, A. W.** (2007). *Knot/Collier* and cut control different aspects of dendrite cytoskeleton and synergize to define final arbor shape. *Neuron* **56**, 963-978.
- Kageyama, R., Ohtsuka, T. and Kobayashi, T.** (2008). Roles of *Hes* genes in neural development. *Dev. Growth Differ.* **50** Suppl., S97-S103.
- Kempermann, G.** (2011). *Adult Neurogenesis*. New York, NY, USA: Oxford University Press.
- Kempermann, G.** (2012). New neurons for 'survival of the fittest'. *Nat. Rev. Neurosci.* **13**, 727-736.
- Kewley, R. J., Whitelaw, M. L. and Chapman-Smith, A.** (2004). The mammalian basic helix-loop-helix/PAS family of transcriptional regulators. *Int. J. Biochem. Cell Biol.* **36**, 189-204.
- King, R. S. and Newmark, P. A.** (2012). The cell biology of regeneration. *J. Cell Biol.* **196**, 553-562.
- Kintner, C.** (2002). Neurogenesis in embryos and in adult neural stem cells. *J. Neurosci.* **22**, 639-643.
- Kratsios, P., Stolfi, A., Levine, M. and Hobert, O.** (2012). Coordinated regulation of cholinergic motor neuron traits through a conserved terminal selector gene. *Nat. Neurosci.* **15**, 205-214.
- Kretzschmar, K. and Watt, F. M.** (2012). Lineage tracing. *Cell* **148**, 33-45.
- Labbé, R. M., Irimia, M., Currie, K. W., Lin, A., Zhu, S. J., Brown, D. D., Ross, E. J., Voisin, V., Bader, G. D., Blencowe, B. J. et al.** (2012). A comparative transcriptomic analysis reveals conserved features of stem cell pluripotency in planarians and mammals. *Stem Cells* **30**, 1734-1745.
- Lapan, S. W. and Reddien, P. W.** (2011). *dlx* and *sp6-9* Control optic cup regeneration in a prototypic eye. *PLoS Genet.* **7**, e1002226.
- Lapan, S. W. and Reddien, P. W.** (2012). Transcriptome analysis of the planarian eye identifies *ovo* as a specific regulator of eye regeneration. *Cell Rep.* **2**, 294-307.
- Lauter, G., Söll, I. and Hauptmann, G.** (2011). Two-color fluorescent in situ hybridization in the embryonic zebrafish brain using differential detection systems. *BMC Dev. Biol.* **11**, 43.
- Lentz, T. L.** (1968). *Primitive Nervous Systems*. New Haven, CT, USA: Yale University Press.
- Liao, D.** (2009). Emerging roles of the *EBF* family of transcription factors in tumor suppression. *Mol. Cancer Res.* **7**, 1893-1901.
- Lindsey, B. W. and Tropepe, V.** (2006). A comparative framework for understanding the biological principles of adult neurogenesis. *Prog. Neurobiol.* **80**, 281-307.
- Michaud, J. L., Rosenquist, T., May, N. R. and Fan, C. M.** (1998). Development of neuroendocrine lineages requires the bHLH-PAS transcription factor *SIM1*. *Genes Dev.* **12**, 3264-3275.
- Nambu, J. R., Lewis, J. O., Wharton, K. A., Jr and Crews, S. T.** (1991). The *Drosophila* single-minded gene encodes a helix-loop-helix protein that acts as a master regulator of CNS midline development. *Cell* **67**, 1157-1167.
- Newmark, P. A. and Sánchez Alvarado, A.** (2000). Bromodeoxyuridine specifically labels the regenerative stem cells of planarians. *Dev. Biol.* **220**, 142-153.
- Newmark, P. A., Wang, Y. and Chong, T.** (2008). Germ cell specification and regeneration in planarians. *Cold Spring Harb. Symp. Quant. Biol.* **73**, 573-581.
- Notredame, C., Higgins, D. G. and Heringa, J.** (2000). T-Coffee: a novel method for fast and accurate multiple sequence alignment. *J. Mol. Biol.* **302**, 205-217.
- Önal, P., Grün, D., Adamidi, C., Rybak, A., Solana, J., Mastrobuoni, G., Wang, Y., Rahn, H. P., Chen, W., Kempa, S. et al.** (2012). Gene expression of pluripotency determinants is conserved between mammalian and planarian stem cells. *EMBO J.* **31**, 2755-2769.
- Pearson, B. J., Eisenhoffer, G. T., Gurley, K. A., Rink, J. C., Miller, D. E. and Sánchez Alvarado, A.** (2009). Formaldehyde-based whole-mount in situ hybridization method for planarians. *Dev. Dyn.* **238**, 443-450.

- Pozzoli, O., Bosetti, A., Croci, L., Consalez, G. G. and Vetter, M. L. (2001). Xebf3 is a regulator of neuronal differentiation during primary neurogenesis in *Xenopus*. *Dev. Biol.* **233**, 495-512.
- Prasad, B. C., Ye, B., Zackhary, R., Schrader, K., Seydoux, G. and Reed, R. R. (1998). *unc-3*, a gene required for axonal guidance in *Caenorhabditis elegans*, encodes a member of the O/E family of transcription factors. *Development* **125**, 1561-1568.
- Probst, M. R., Fan, C. M., Tessier-Lavigne, M. and Hankinson, O. (1997). Two murine homologs of the *Drosophila* single-minded protein that interact with the mouse aryl hydrocarbon receptor nuclear translocator protein. *J. Biol. Chem.* **272**, 4451-4457.
- Ramón y Cajal, S. (1928). *Degeneration and Regeneration of the Nervous System*. London, UK: Oxford University Press.
- Reddien, P. W. (2013). Specialized progenitors and regeneration. *Development* **140**, 951-957.
- Reddien, P. W., Bermange, A. L., Murfitt, K. J., Jennings, J. R. and Sánchez Alvarado, A. (2005a). Identification of genes needed for regeneration, stem cell function, and tissue homeostasis by systematic gene perturbation in planaria. *Dev. Cell* **8**, 635-649.
- Reddien, P. W., Oviedo, N. J., Jennings, J. R., Jenkin, J. C. and Sánchez Alvarado, A. (2005b). SMEDWI-2 is a PIWI-like protein that regulates planarian stem cells. *Science* **310**, 1327-1330.
- Resch, A. M., Palakodeti, D., Lu, Y. C., Horowitz, M. and Graveley, B. R. (2012). Transcriptome analysis reveals strain-specific and conserved stemness genes in *Schmidtea mediterranea*. *PLoS ONE* **7**, e34447.
- Richard, J. P., Zuryn, S., Fischer, N., Pavet, V., Vaucamps, N. and Jarriault, S. (2011). Direct in vivo cellular reprogramming involves transition through discrete, non-pluripotent steps. *Development* **138**, 1483-1492.
- Richards, G. S., Simionato, E., Perron, M., Adamska, M., Vervoort, M. and Degnan, B. M. (2008). Sponge genes provide new insight into the evolutionary origin of the neurogenic circuit. *Curr. Biol.* **18**, 1156-1161.
- Rink, J. C. (2013). Stem cell systems and regeneration in planaria. *Dev. Genes Evol.* **223**, 67-84.
- Robb, S. M., Ross, E. and Sánchez Alvarado, A. (2008). SmedGD: the Schmidtea mediterranea genome database. *Nucleic Acids Res.* **36**, D599-D606.
- Scimone, M. L., Srivastava, M., Bell, G. W. and Reddien, P. W. (2011). A regulatory program for excretory system regeneration in planarians. *Development* **138**, 4387-4398.
- Simionato, E., Ledent, V., Richards, G., Thomas-Chollier, M., Kerner, P., Coornaert, D., Degnan, B. M. and Vervoort, M. (2007). Origin and diversification of the basic helix-loop-helix gene family in metazoans: insights from comparative genomics. *BMC Evol. Biol.* **7**, 33.
- Solana, J., Kao, D., Mihaylova, Y., Jaber-Hijazi, F., Malla, S., Wilson, R. and Aboobaker, A. (2012). Defining the molecular profile of planarian pluripotent stem cells using a combinatorial RNAseq, RNA interference and irradiation approach. *Genome Biol.* **13**, R19.
- Umesono, Y., Tasaki, J., Nishimura, K., Inoue, T. and Agata, K. (2011). Regeneration in an evolutionarily primitive brain—the planarian *Dugesia japonica* model. *Eur. J. Neurosci.* **34**, 863-869.
- Vargas-Vila, M. A., Hannibal, R. L., Parchem, R. J., Liu, P. Z. and Patel, N. H. (2010). A prominent requirement for single-minded and the ventral midline in patterning the dorsoventral axis of the crustacean *Parhyale hawaiiensis*. *Development* **137**, 3469-3476.
- Wagner, D. E., Wang, I. E. and Reddien, P. W. (2011). Clonogenic neoblasts are pluripotent adult stem cells that underlie planarian regeneration. *Science* **332**, 811-816.
- Wightman, B., Baran, R. and Garriga, G. (1997). Genes that guide growth cones along the *C. elegans* ventral nerve cord. *Development* **124**, 2571-2580.
- Xu, C. and Fan, C. M. (2007). Allocation of paraventricular and supraoptic neurons requires Sim1 function: a role for a Sim1 downstream gene *PlexinC1*. *Mol. Endocrinol.* **21**, 1234-1245.
- Zayas, R. M., Hernández, A., Habermann, B., Wang, Y., Stary, J. M. and Newmark, P. A. (2005). The planarian *Schmidtea mediterranea* as a model for epigenetic germ cell specification: analysis of ESTs from the hermaphroditic strain. *Proc. Natl. Acad. Sci. USA* **102**, 18491-18496.
- Zhu, S. J. and Pearson, B. J. (2013). The Retinoblastoma pathway regulates stem cell proliferation in freshwater planarians. *Dev. Biol.* **373**, 442-452.
